# Supplementary material for: Homo- and heterometallic planes, chains and cubanes
Source: Royal Society of Chemistry journal article supplement (doi:10.1039/c3dt51131f), 2013-01-01
Supplement: c3dt51131f.pdf [file c3dt51131f.pdf]

*Electronic Supplementary Information*

## Homo- and Heterometallic Planes, Chains and Cubanes

Seán T. Meally,<sup>a</sup> Stephanie M. Taylor,<sup>b</sup> Euan K. Brechin,<sup>b</sup> Stergios Piligkos,<sup>c\*</sup> and  
Leigh F. Jones<sup>a\*</sup>

<sup>a</sup> School of Chemistry, University Road, National University of Ireland, Galway, Ireland. Tel: +353-091-49-3462; E-mail: leigh.jones@nuigalway.ie

<sup>b</sup> School of Chemistry, Joseph Black Building, University of Edinburgh, West Mains Road, Edinburgh, Scotland, UK.

<sup>c</sup> Department of Chemistry, University of Copenhagen, Universitetsparken 5, DK-2100, Denmark.

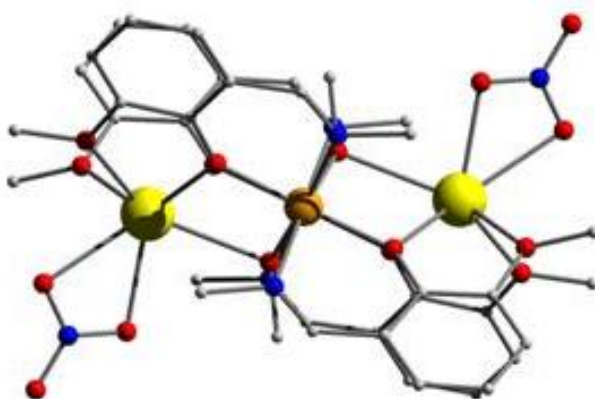

**Figure S1** Side views along the plane of the  $[\text{Na}_2\text{M}_2]$  butterfly cores in **1**. Colour codes: Brown (Fe), Yellow (Na), Red (O), Blue (N), Grey (C). Hydrogen atoms have been omitted for clarity.

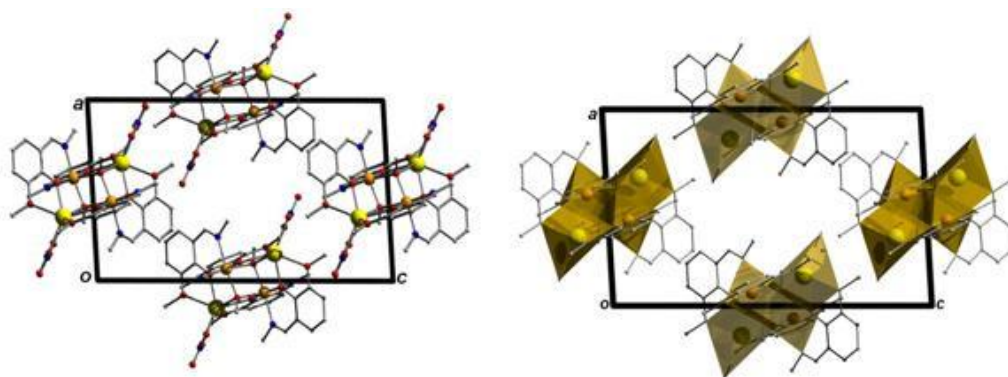

**Fig. S2** Ball and stick (left) and polyhedral (right) crystal packing schematics of **1** as viewed along the  $[0\ 1\ 0]$  face of the cell. Hydrogen atoms have been omitted for clarity. Complex **2** packs in the same way.

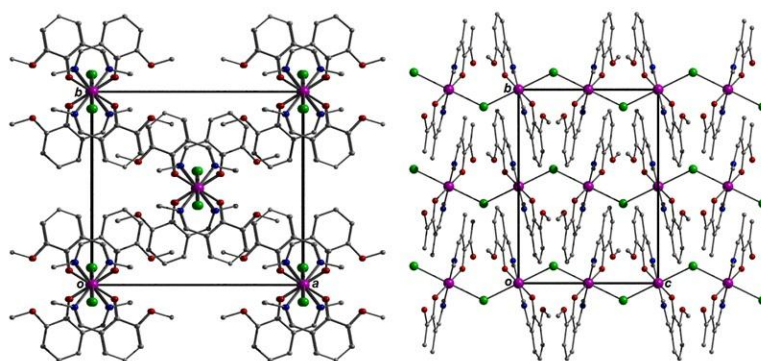

**Figure S3:** Crystal packing in **4** as observed down the *c* (left) *a* axis (right) respectively. Colour codes: Pink (Mn), Green (Cl), Red (O), Blue (N), Grey (C). Hydrogen atoms have been omitted for clarity.

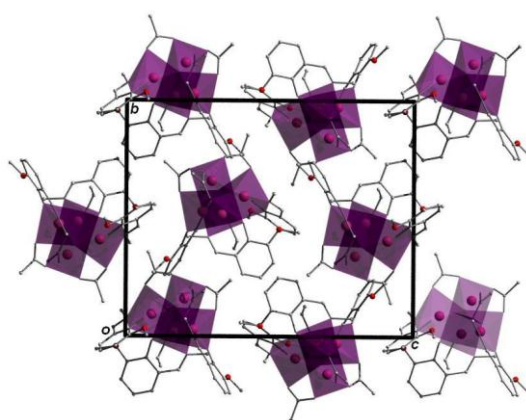

**Figure S4:** Polyhedral representation of the crystal packing in **5** observed down the *a* axis. Hydrogen atoms have been omitted for clarity.

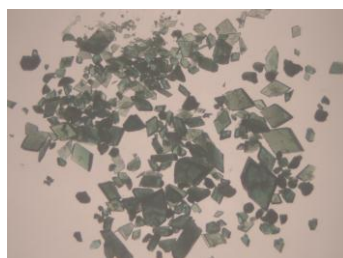

**Fig. S5** Microscope image of crystalline sample of  $[\text{Ni}_4(\mu_3\text{-OMe})_4(\text{L}_2)_4(\text{MeOH})_4]$  (**6**).

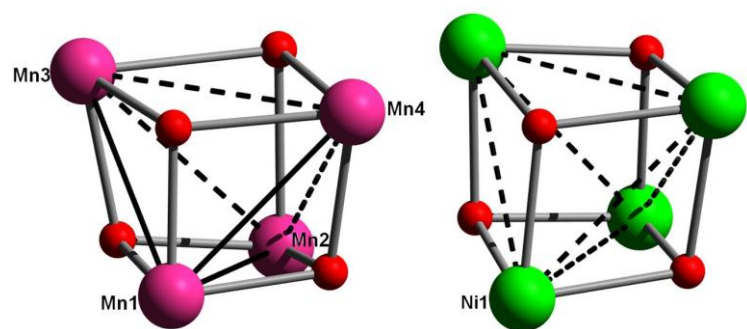

**Fig. S6** (left) Schematic representing the 2-J model employed to fit the magnetic data in **5** (solid lines =  $J_1$ , dashed lines =  $J_2$ ). (right) 1-J model utilised in fitting magnetic data from complex **6** (dashed line =  $J_1$ ). For specific spin Hamiltonian parameters see main text.

**Table S1:** Selected bond length (Å) and angles (°) obtained from complexes **1-3**

| Bond lengths (Å) / angles (°) | 1         | Bond lengths (Å) / angles (°) | 2          | Bond lengths (Å) / angles (°) | 3         |
|-------------------------------|-----------|-------------------------------|------------|-------------------------------|-----------|
| Fe1-O2                        | 1.944(6)  | Ni1-O2                        | 2.0056(13) | Ni1-O1                        | 2.058(7)  |
| Fe1-O4                        | 1.956(6)  | Ni1-O4                        | 2.0038(12) | Ni1-N1                        | 2.106(10) |
| Fe1-O5                        | 2.015(6)  | Ni1-N1                        | 2.2084(15) | Ni2-O4                        | 2.043(7)  |
| Fe1-O5'                       | 2.032(6)  | Ni1'-N1                       | 2.1758(15) | Ni2-N2                        | 2.104(9)  |
| Fe1-N1                        | 2.152(7)  | Ni1 N4                        | 2.0771(15) |                               |           |
| Fe1-N2                        | 2.152(7)  | Ni1 N5                        | 2.0609(15) | Na1-O1                        | 2.686(9)  |
|                               |           |                               |            | Na1-O1'                       | 2.265(8)  |
| Na1-O1                        | 2.427(7)  | Na1-O1                        | 2.4470(15) | Na1-O2                        | 2.329(9)  |
| Na1-O2                        | 2.350(7)  | Na1-O2                        | 2.2501(14) | Na1-O3                        | 2.343(9)  |
| Na1-O3                        | 2.398(7)  | Na1-O3                        | 2.4611(15) | Na1-O4                        | 2.262(8)  |
| Na1-O4                        | 2.371(7)  | Na1-O4                        | 2.2640(14) | Na1-O4'                       | 2.618(8)  |
| Na1-O5                        | 2.604(7)  | Na1-N1                        | 2.5790(17) |                               |           |
| Na1-O6                        | 2.545(9)  | Na1-N6                        | 2.4558(19) | Ni1-O1-Na1                    | 109.6(3)  |
| Na1-O8                        | 2.374(10) |                               |            | Ni2-O4-Na1                    | 108.9(3)  |
|                               |           | Ni1-N1-Na1                    | 91.95(6)   | Na1-O1-Na1'                   | 81.8(3)   |
| Fe1-O5-Fe1'                   | 101.4(3)  | Ni1'-N1-Na1                   | 93.14(6)   | Na1-O4-Na1'                   | 83.4(3)   |
| Fe1-O2-Na1                    | 108.1(3)  | Ni1-O2-Na1                    | 108.28(6)  |                               |           |
| Fe1-O5-Na1                    | 97.1(2)   | Ni1'-O4-Na1                   | 108.37(6)  |                               |           |
| Fe1-O4-Na1                    | 105.4(3)  | Ni1-N1-Ni1'                   | 99.75(6)   |                               |           |

**Table S2:** Selected bond length (Å) obtained from complex **4**

| Bond lengths (Å) | <b>4</b> |
|------------------|----------|
| Mn1-O1           | 1.854(2) |
| Mn1-N1           | 2.030(3) |
| Mn1-Cl1          | 2.676(7) |
|                  |          |
| Mn...Mn          | 4.845    |

**Table S3:** Selected bond length (Å) and angles (°) obtained from complexes **5** and **6**.

| Bond lengths (Å) /<br>angles (°) |          | Bond lengths<br>(Å) / angles (°) |            |
|----------------------------------|----------|----------------------------------|------------|
| Mn1-O8                           | 1.975(3) | Mn1-O16-Mn3                      | 94.78(13)  |
| Mn1-O10                          | 1.949(3) | Mn1-O16-Mn2                      | 94.29(13)  |
| Mn1-O11                          | 1.954(3) | Mn1-O14-Mn2                      | 95.79(14)  |
| Mn1-O14                          | 1.854(3) | Mn1-O14-Mn4                      | 95.55(13)  |
| Mn1-O15                          | 1.868(3) | Mn1-O15-Mn3                      | 96.18(13)  |
| Mn1-O16                          | 1.885(3) | Mn1-O15-Mn4                      | 93.56(13)  |
|                                  |          | Mn2-O16-Mn3                      | 109.87(14) |
| Mn2-O1                           | 1.880(3) | Mn2-O13-Mn3                      | 90.56(12)  |
| Mn2-O9                           | 2.231(3) | Mn2-O13-Mn4                      | 88.78(11)  |
| Mn2-O13                          | 2.241(3) | Mn2-O14-Mn4                      | 108.14(14) |
| Mn2-O14                          | 1.936(3) | Mn3-O13-Mn4                      | 91.53(12)  |
| Mn2-O16                          | 1.950(3) | Mn3-O15-Mn4                      | 110.86(15) |
| Mn2-N1                           | 1.996(4) |                                  |            |
|                                  |          | <b>(6)</b>                       |            |
| Mn3-O5                           | 1.872(3) | Ni1-O1                           | 2.090(4)   |
| Mn3-O12                          | 2.236(3) | Ni1-O2                           | 2.034(3)   |
| Mn3-O13                          | 2.250(4) | Ni1-O2'                          | 2.066(4)   |
| Mn3-O15                          | 1.925(3) | Ni1-O2''                         | 2.022(4)   |
| Mn3-O16                          | 1.949(3) | Ni1-O3                           | 1.991(3)   |
| Mn3-N3                           | 2.024(4) | Ni1-N1                           | 2.004(3)   |
|                                  |          |                                  |            |
| Mn4-O3                           | 1.856(3) | Ni1-O2-Ni1'                      | 97.93(14)  |
| Mn4-O7                           | 2.182(3) | Ni1-O2-Ni1''                     | 96.51(14)  |
| Mn4-O13                          | 2.223(3) | Ni1-O2-Ni1'''                    | 98.36(16)  |

|         |          |  |  |
|---------|----------|--|--|
| Mn4-O14 | 1.921(3) |  |  |
| Mn4-O15 | 1.967(3) |  |  |
| Mn4-N2  | 2.018(4) |  |  |

**Table SI4:** BVS Calculations for the Manganese centres in **5** (figures to 2 d.p)

| <b>Calculated as:</b> | <b>Mn1</b> | <b>Mn2</b> | <b>Mn3</b> | <b>Mn4</b> |
|-----------------------|------------|------------|------------|------------|
| Mn <sup>III</sup>     | 3.99       | 3.01       | 2.99       | 3.09       |
| Mn <sup>IV</sup>      | 3.91       | 2.96       | 2.94       | 3.03       |

**X-ray diffraction details on the collection of 1-6**

All hydrogen atoms in all complexes were placed in calculated positions. All non-hydrogen atoms were refined anisotropically. In complex **1** the MeOH solvent molecules were modelled to be disordered over two sites at 50:50 occupancy. DFIX restraints were also put in place between the C and O atoms in both disordered MeOH solvent molecules.
